# Supplementary material for: Unusual domain architecture of aminoacyl tRNA synthetases and their paralogs from Leishmania major
Source: PubMed Central journal article supplement (PMC3532385; doi:10.1186/1471-2164-13-621), 2012-11-14

**Additional Figure 4**

Sequence based phylogeny of D-tyrosine deacylases (Dtdas) from DTDA2\_HUMAN (sp|Q96FN9); DTD2\_MOUSE (sp|Q8BHA3); DTD2\_DANRE (sp|Q68EL2); DTD1\_ECOLI (1JKE); DTD2\_HINF (1J7G); DTD1\_AAQU (2DBO); DTD1\_PFAL (3K05); DTD1\_BOVIN (sp|Q2T9V8); DTD1\_HUMAN (2OKV); GEK1\_ARATH (sp|Q9ZPQ3); DTDA\_PYRFU (sp|P58852); DTDA\_PYRHO (sp|O57774); DTDA\_PYRAB (sp|Q9V2R8) constructed using MEGA v5.0 using Maximum Likelihood method based on JTT matrix model. Bootstrap values are indicated at the nodes.

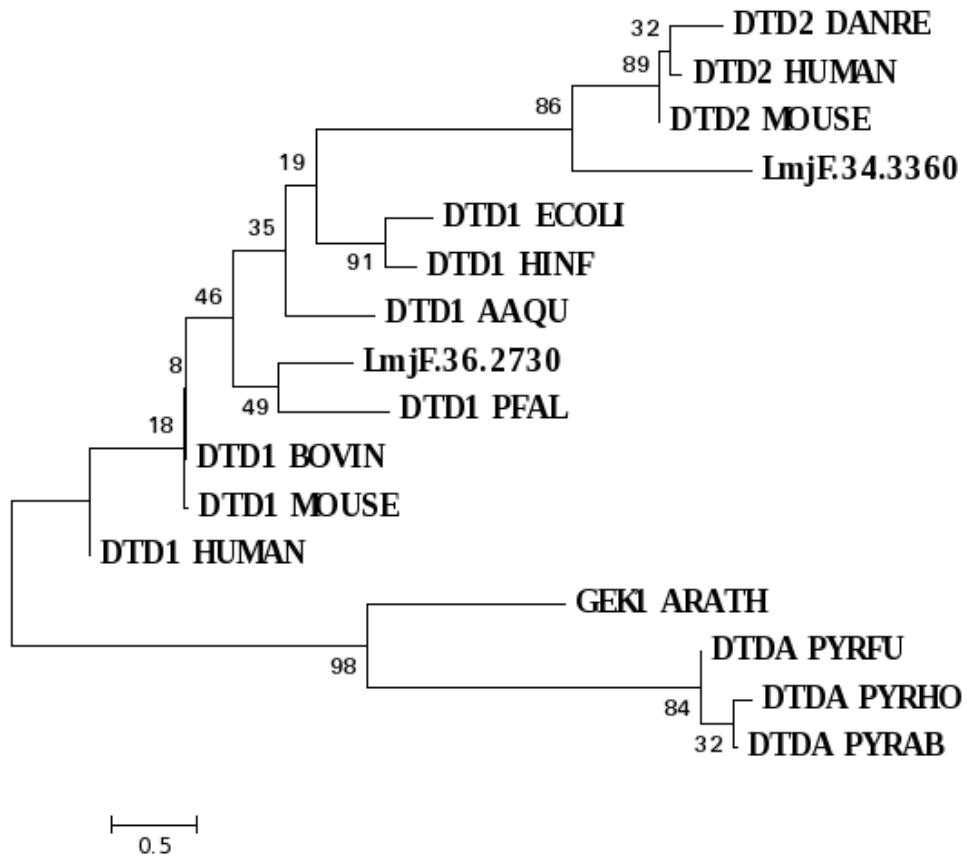

Supplement: 1471-2164-13-621-S6.pdf [file 1471-2164-13-621-S6.pdf]
